# Supplementary material
Source: HighWire-hosted journal article supplement (https://jnm.snmjournals.org/highwire/filestream/95234/field_highwire_adjunct_files/0/193854_Supplemental_Data.pdf)
Supplement: 193854_Supplemental_Data.pdf [file 193854_Supplemental_Data.pdf]

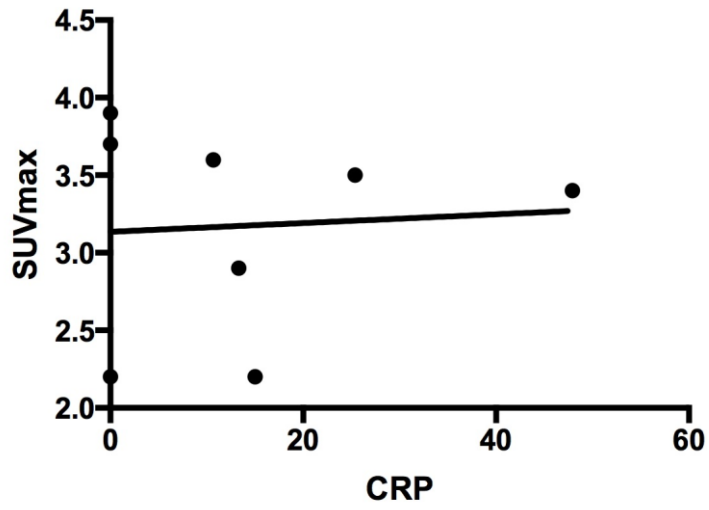

**SUPPLEMENTAL FIGURE 1 COMPARISON OF CRP AND SUV<sub>max</sub>.** SUV<sub>max</sub> did not correlate with CRP levels (r=0.002).
